# Supplementary material for: Exploring temporal and spatial variation of nitrous oxide flux using several years of peatland forest automatic chamber data
Source: Copernicus journal article supplement (doi:10.5194/egusphere-2023-1795), 2023-09-07
Supplement: Supplementary file 1 [file egusphere-2023-1795-supplement.pdf]

## S1. Chamber characteristics

**Table S1: Vegetation and distance to nearest trees and ditches. Only living trees growing within 5 m from each chamber are included.**

| Chamber | Species                                                                                                                                                                              | Trees (< 5m from chamber)                                                                                                                                                                                                    | Distance to ditch |
|---------|--------------------------------------------------------------------------------------------------------------------------------------------------------------------------------------|------------------------------------------------------------------------------------------------------------------------------------------------------------------------------------------------------------------------------|-------------------|
| 1       | <i>Vaccinium vitis-idea</i> , <i>Carex globularis</i> ,<br><i>Pleurozium schreberi</i> , <i>Hylocomium splendens</i> , <i>Dicranum polysetum</i>                                     | 2.6 m Picea abies, 3.1 m Betula pubescens, 4.8 m Picea Abies                                                                                                                                                                 | 12 m              |
| 2       | <i>Vaccinium myrtillus</i> , <i>Dryopteris carthusiana</i> , <i>Dicranum polysetum</i> ,<br><i>Pleurozium schreberi</i>                                                              | Picea abies 3.7 m                                                                                                                                                                                                            | 10 m              |
| 3       | <i>Sphagnum spp.</i> , <i>Trientalis europaea</i>                                                                                                                                    | 3.2 m Picea abies, 4.2 m Betula pubescens, 2.4 m Picea abies, 2.2 m Betula pubescens, 3 m Picea abies, 4.2 m Betula pubescens, 4.4 m Picea abies                                                                             | 20 m              |
| 4       | <i>Pleurozium schreberi</i> , <i>Dicranum polysetum</i>                                                                                                                              | 2.9 m Picea abies, 2.5 m Betula pubescens, 3.3 m Picea abies, 3.5 m Betula pubescens, 2.4 m Betula pubescens, 2.4 m Picea abies, 2.8 m Picea abies                                                                           | 5 m               |
| 5       | <i>Dryopteris carthusiana</i> , <i>Vaccinium vitis-idaea</i> , <i>Vaccinium myrtillus</i> ,<br><i>Pleurozium schreberi</i> , <i>Dicranum polysetum</i> , <i>Hylocomium splendens</i> | 1.9 m Picea abies, 1.6 m Picea abies, 1.2 m Pinus sylvestris, 4.8 m Betula pubescens, 4.5 m Picea abies                                                                                                                      | 5 m               |
| 6       | <i>Trientalis europaea</i> , <i>Pleurozium schreberi</i> , <i>Dicranum polysetum</i> ,<br><i>Hylocomium splendens</i>                                                                | 2.8 m Picea abies, 3.4 m Betula pubescens, 4.9 m Picea abies, 1.9 m Picea abies, 3.4 m Betula pubescens, 3.8 m Picea abies, 5 m Picea abies, 3.2 m Picea abies, 2.1 m Picea abies, 2.3 m Betula pubescens, 2.7 m Picea abies | 20 m              |

## S2. N<sub>2</sub>O flux histograms

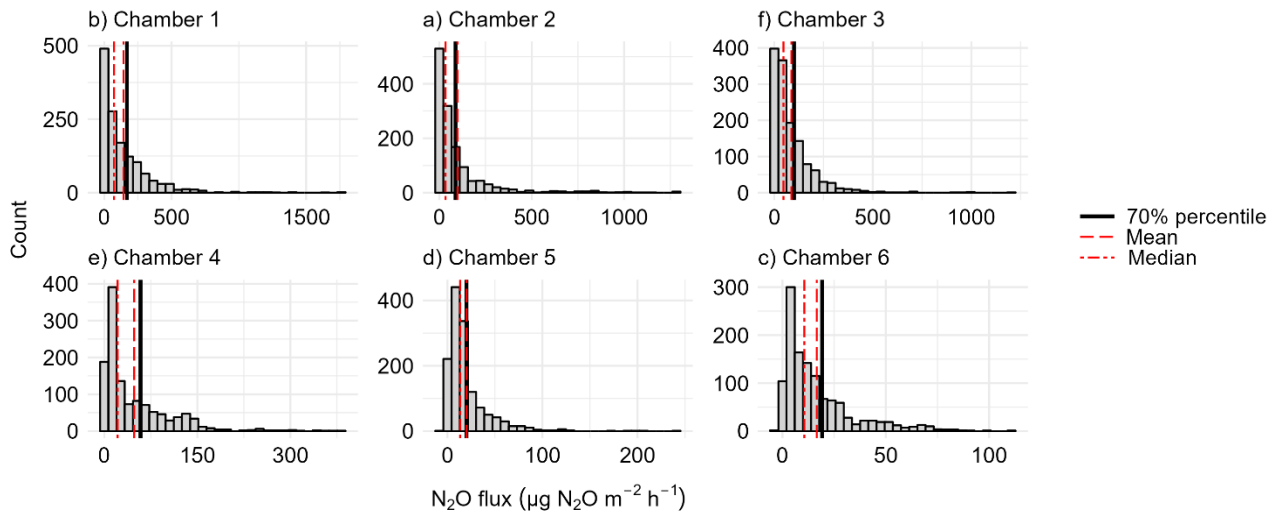

**Figure S2: Distribution of daily mean N<sub>2</sub>O flux in chambers 1-6. The chamber-specific mean, median and 70 % percentile that was used to define high-flux days, are shown as vertical lines.**

## S3. Spatio-temporal variation of N<sub>2</sub>O fluxes

**Table S3.1: Mean, minimum and maximum N<sub>2</sub>O fluxes in different measurement years. Unit of the N<sub>2</sub>O flux is µg N<sub>2</sub>O m<sup>-2</sup> h<sup>-1</sup>. Years 2015 and 2019 include only part of the year (\*). Measurements in Chamber 6 ended six months earlier in 2019 than in other chambers.**

| Chamber | 2015* |     |     | 2016 |     |      | 2017 |     |      | 2018 |     |     | 2019* |     |     |
|---------|-------|-----|-----|------|-----|------|------|-----|------|------|-----|-----|-------|-----|-----|
|         | Mean  | Min | Max | Mean | Min | Max  | Mean | Min | Max  | Mean | Min | Max | Mean  | Min | Max |
| 1       | 77    | 2   | 467 | 215  | 26  | 1266 | 233  | -1  | 1761 | 43   | 0.1 | 322 | 131   | 0.5 | 717 |
| 2       | 63    | 4   | 359 | 189  | 6   | 1272 | 145  | -1  | 1282 | 24   | 0.4 | 198 | 48    | 0   | 294 |
| 3       | 61    | -12 | 476 | 151  | 15  | 1192 | 130  | 7   | 937  | 30   | 0.5 | 227 | 50    | 0   | 333 |
| 4       | 27    | 2   | 85  | 71   | 9   | 228  | 89   | 7   | 381  | 21   | 1   | 110 | 18    | -1  | 87  |
| 5       | 16    | 0   | 54  | 24   | 3   | 118  | 27   | -1  | 244  | 12   | -5  | 201 | 21    | -2  | 103 |
| 6       | 16    | 1   | 71  | 24   | -1  | 111  | 23   | -1  | 74   | 7    | -3  | 31  | 7     | -3  | 25  |

**Table S3.2: Mean, minimum and maximum N<sub>2</sub>O fluxes ( $\mu\text{g N}_2\text{O m}^{-2} \text{h}^{-1}$ ) in different thermal seasons. All years are included.**

| Chamber | Spring |     |     | Summer |     |      | Autumn |     |     | Winter |     |      |
|---------|--------|-----|-----|--------|-----|------|--------|-----|-----|--------|-----|------|
|         | Mean   | Min | Max | Mean   | Min | Max  | Mean   | Min | Max | Mean   | Min | Max  |
| 1       | 122    | 0   | 621 | 199    | 0   | 1761 | 86     | 2   | 717 | 117    | -1  | 1266 |
| 2       | 55     | -1  | 298 | 173    | 0   | 1282 | 45     | 6   | 211 | 49     | 0   | 339  |
| 3       | 57     | 1   | 228 | 96     | 3   | 937  | 44     | -12 | 220 | 117    | 0   | 1192 |
| 4       | 71     | 1   | 306 | 47     | -1  | 381  | 14     | 1   | 72  | 62     | 1   | 184  |
| 5       | 15     | 0   | 52  | 20     | -5  | 244  | 11     | -1  | 54  | 30     | -3  | 201  |
| 6       | 9      | -3  | 41  | 20     | -1  | 77   | 8      | -3  | 42  | 21     | -1  | 112  |

#### S4. Time series correlations

**Table S4.1: Correlation of N<sub>2</sub>O time series between each pair of chambers. Correlations were statistically significant ( $p < 0.05$ ).**

|           | Chamber 1 | Chamber 2 | Chamber 3 | Chamber 4 | Chamber 5 | Chamber 6 |
|-----------|-----------|-----------|-----------|-----------|-----------|-----------|
| Chamber 1 | 1.00      | 0.79      | 0.64      | 0.65      | 0.36      | 0.40      |
| Chamber 2 | 0.79      | 1.00      | 0.75      | 0.55      | 0.29      | 0.47      |
| Chamber 3 | 0.64      | 0.75      | 1.00      | 0.69      | 0.41      | 0.53      |
| Chamber 4 | 0.65      | 0.55      | 0.69      | 1.00      | 0.46      | 0.48      |
| Chamber 5 | 0.36      | 0.29      | 0.41      | 0.46      | 1.00      | 0.49      |
| Chamber 6 | 0.40      | 0.47      | 0.53      | 0.48      | 0.49      | 1.00      |

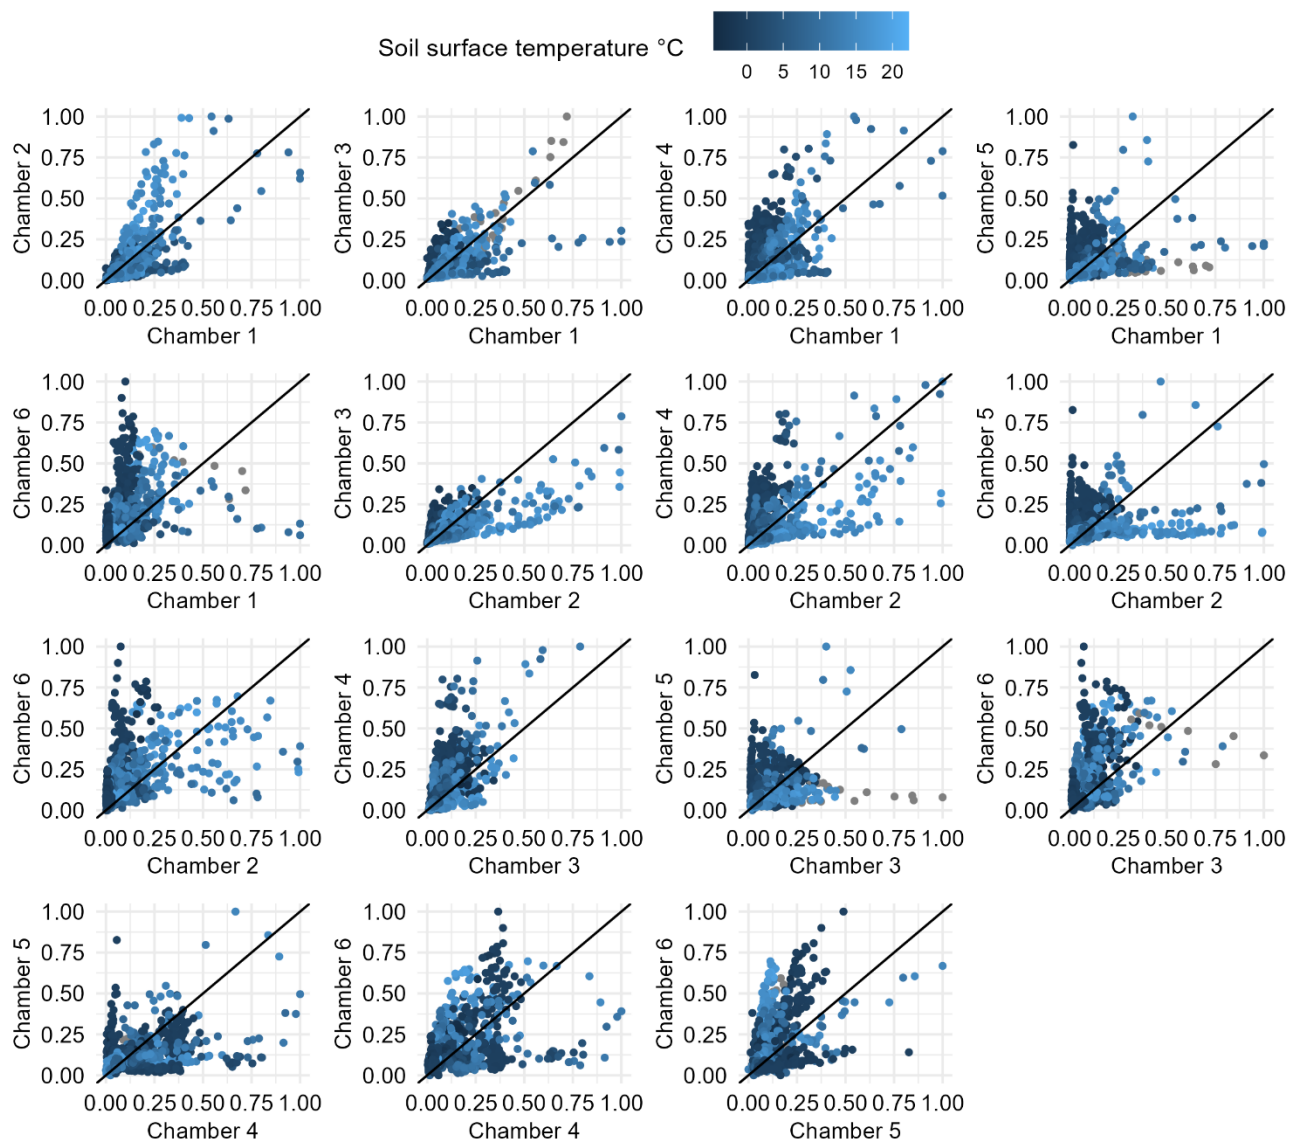

**Figure S4.2: Correlations of scaled N<sub>2</sub>O fluxes.** Figure axes show scaled daily mean N<sub>2</sub>O fluxes of each chamber (maximum daily mean flux = 1, minimum daily mean flux = 0). Daily mean fluxes are colored by daily mean soil surface temperature that explained variance between fluxes of each chamber pair statistically significantly ( $p < 0.05$ ) in all chamber pairs except between chambers 1 and 2 and chamber 3 and 6.

## S5. Temporal variation of N<sub>2</sub>O within a year

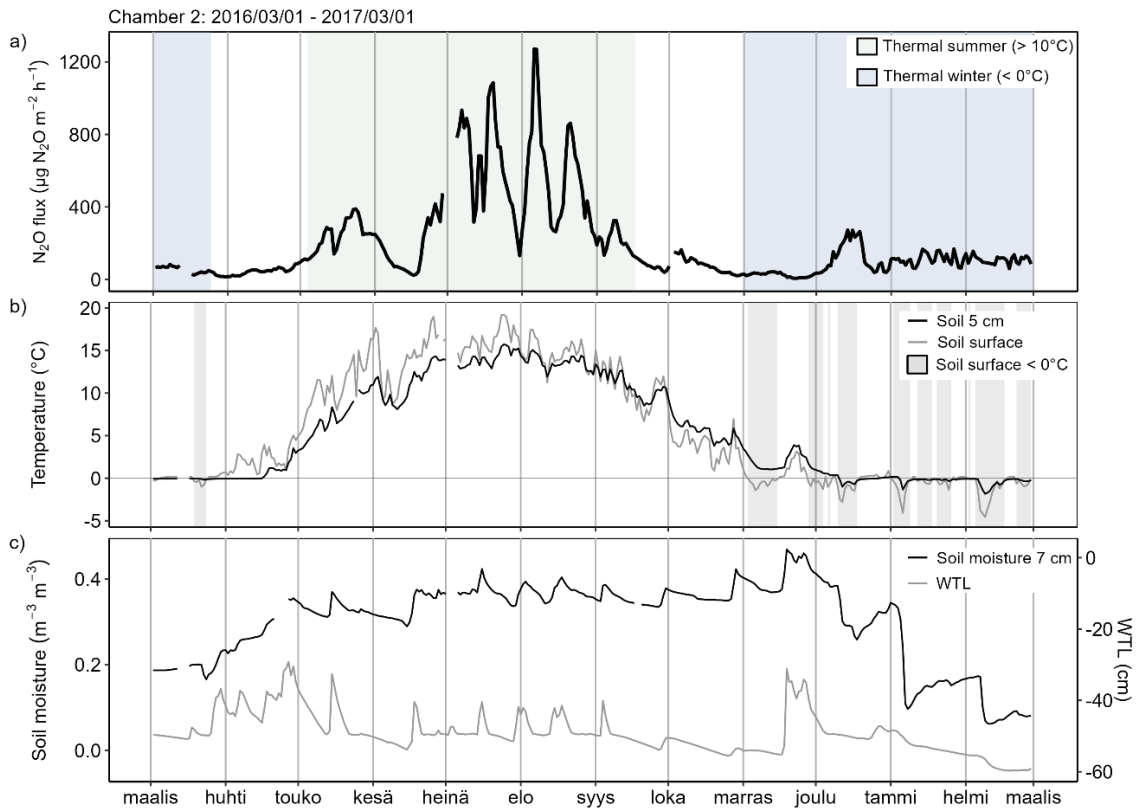

**Figure S5.1:** a) Daily mean N<sub>2</sub>O flux, b) soil surface temperature and temperature at 5 cm depth with highlighted freezing periods (soil surface temperature < 0°C), and c) soil moisture and water table level (WTL) from February 2016 to March 2017 in Chamber 2. The shown temporal dynamics of N<sub>2</sub>O flux were measured in a year with relatively wet summer and warm winter. Data are not gap-filled. Figure for Chamber 1 is presented in the manuscript (Fig. 6).

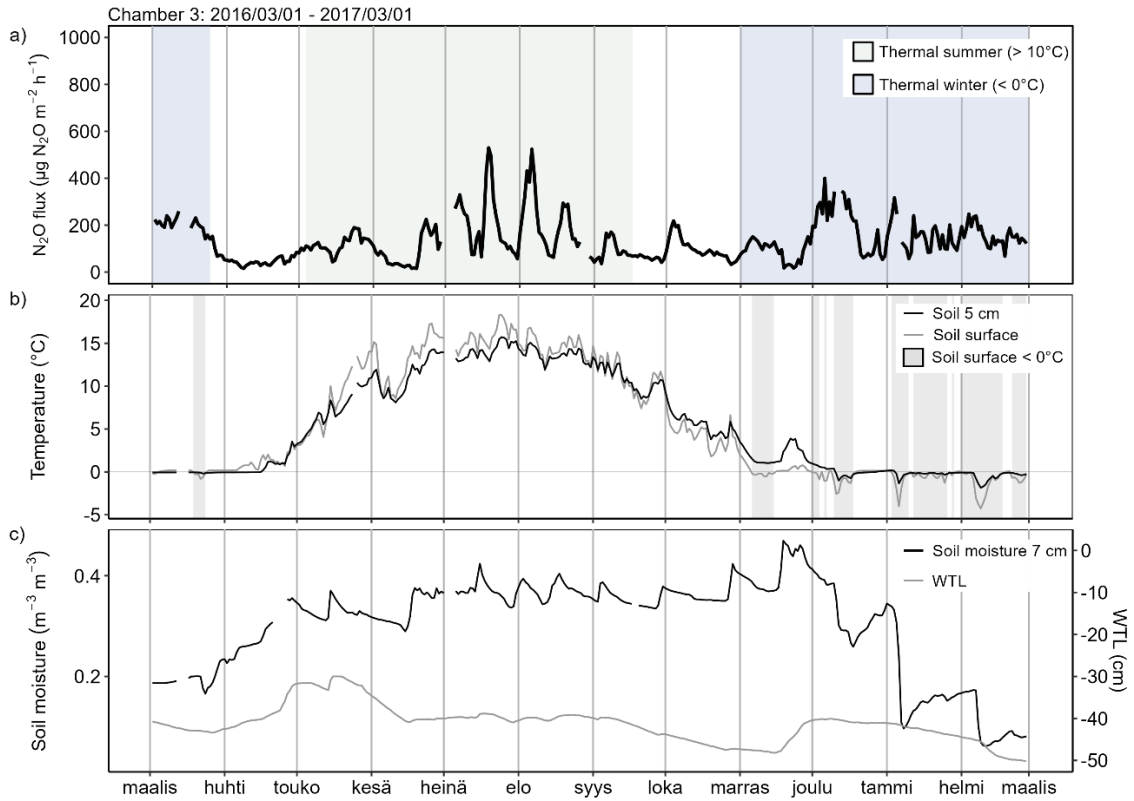

**Figure S5.2: Temporal variation of  $\text{N}_2\text{O}$  flux and environmental conditions between springs 2016 and 2017 in chamber 3. See details in caption above (Fig. S5.1)**

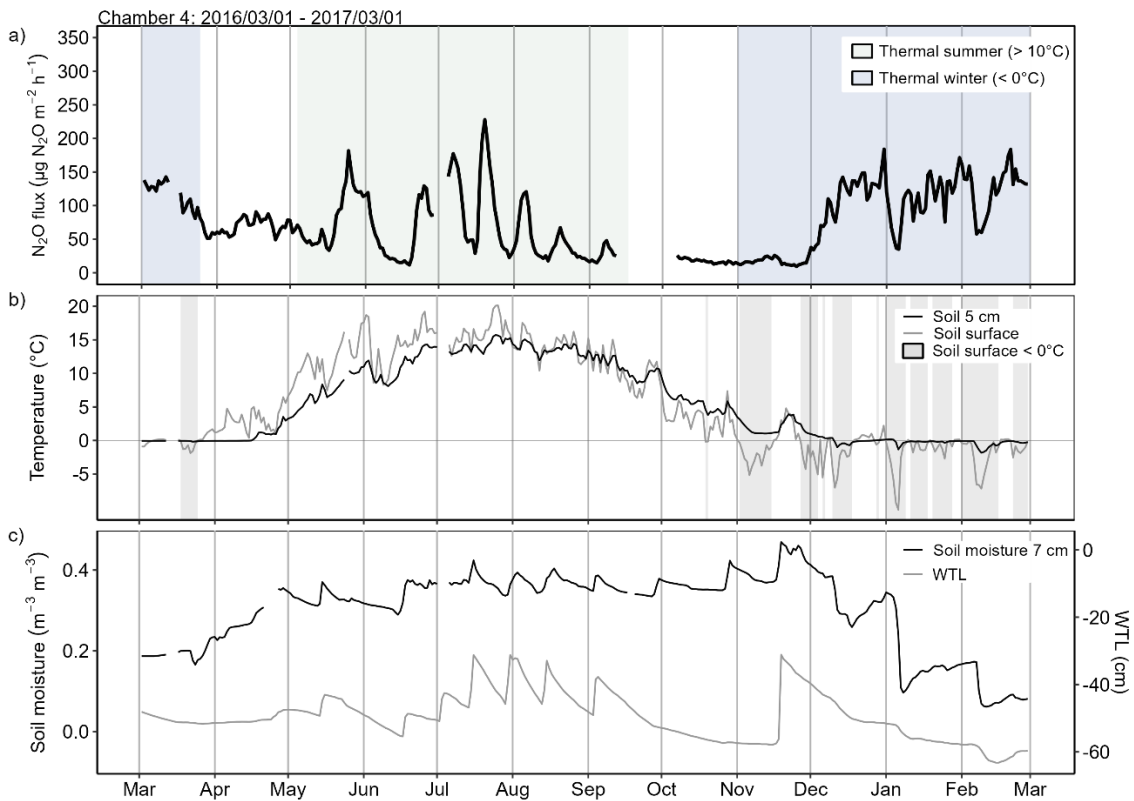

**Figure S5.3: Temporal variation of N<sub>2</sub>O flux and environmental conditions between springs 2016 and 2017 in chambers 4. See details in caption above (Fig. S5.1)**

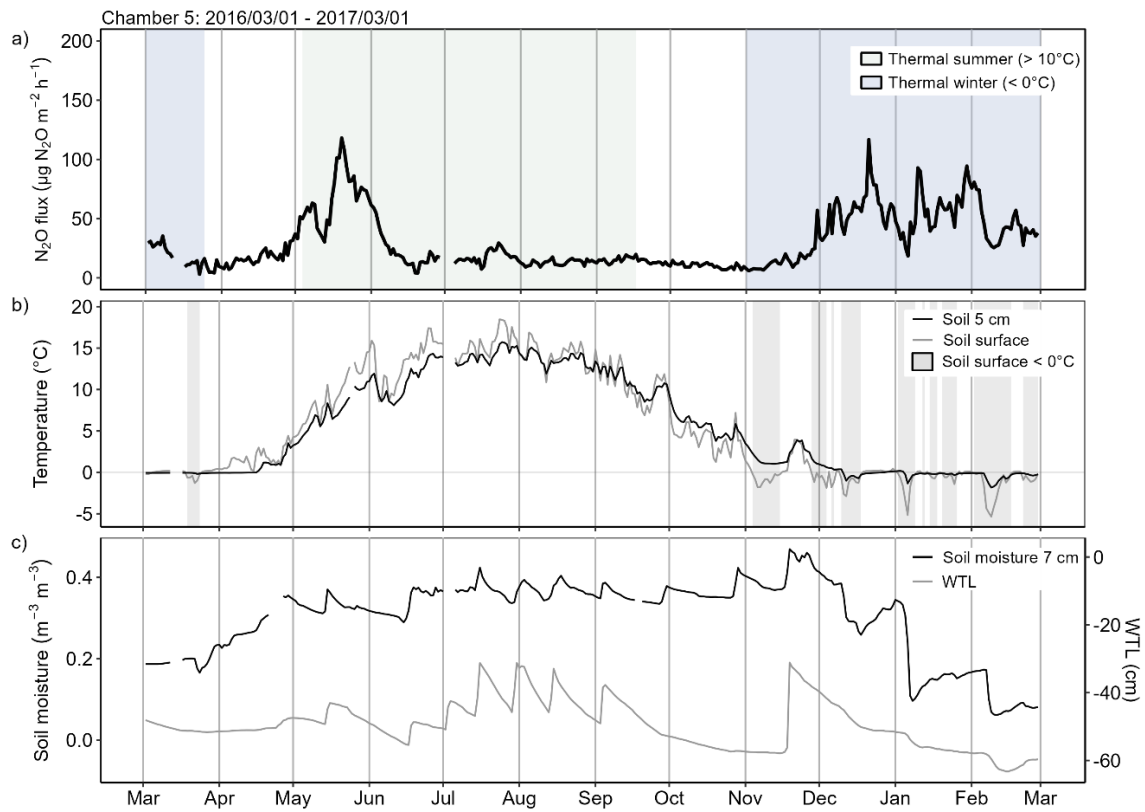

**Figure S5.4: Temporal variation of N<sub>2</sub>O flux and environmental conditions between springs 2016 and 2017 in chambers 5. See details in caption above (Fig. S5.1)**

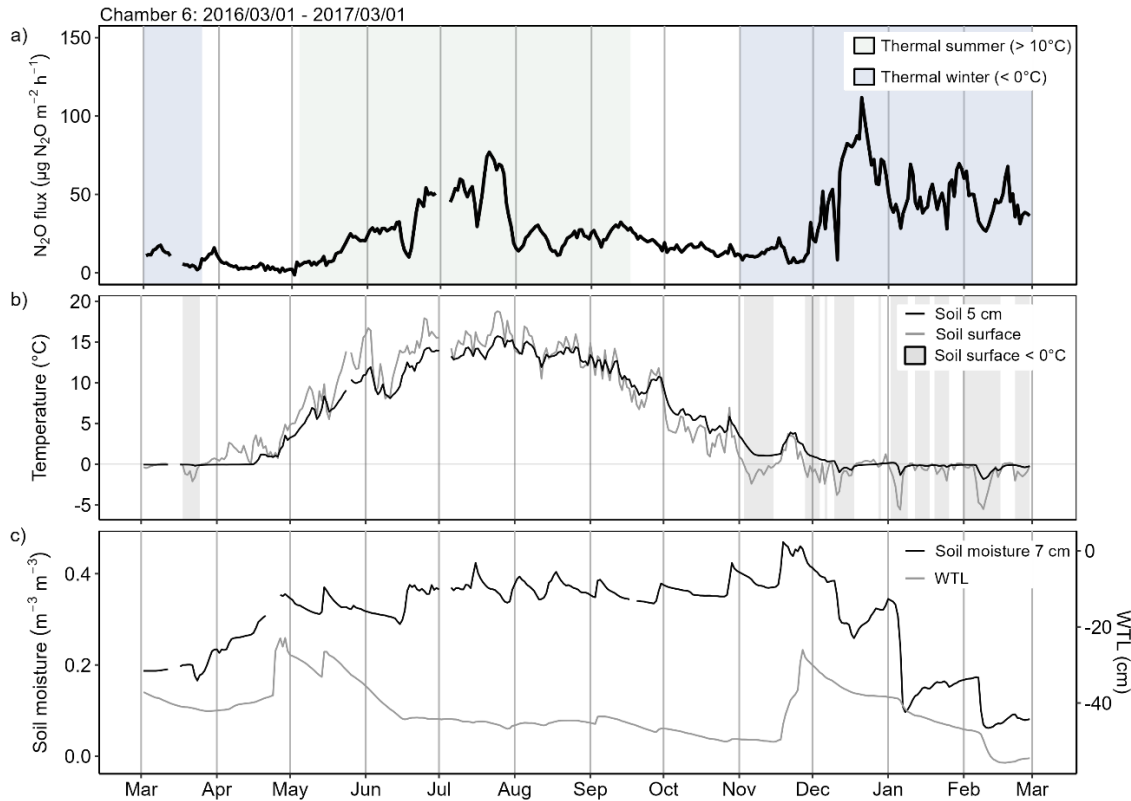

**Figures S5.5:** Temporal variation of  $\text{N}_2\text{O}$  flux and environmental conditions between springs 2016 and 2017 in chambers 6. See details in caption above (Fig. S5.1)

### S6. $\text{N}_2\text{O}$ flux responses to immediate and time-lagged environmental conditions

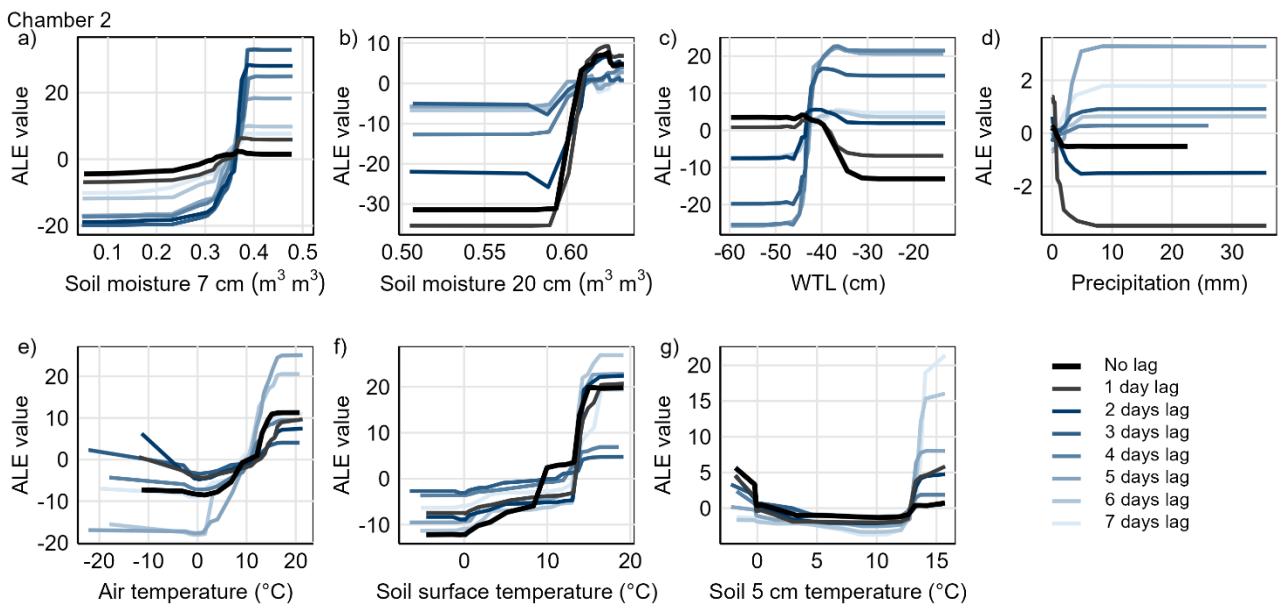

**Figure S6.1:** Response curves between  $\text{N}_2\text{O}$  flux and environmental variables for Chamber 2 visualized using Accumulated Local Effects (ALE). Figures illustrate how the predicted  $\text{N}_2\text{O}$  flux values deviate from the mean predicted flux (ALE = 0) along the gradients of a) soil moisture at 7 cm depth, b) soil moisture at 20 cm depth, c) water table level (WTL), d)



precipitation, e) air temperature, f) soil surface temperature and g) soil temperature at 5 cm. ALE responses for unlagged and lagged variables (1–7 days) are included. Lines represent the mean ALE values of 10 model runs. Responses for chamber 1 are presented in the manuscript (Fig. 9).

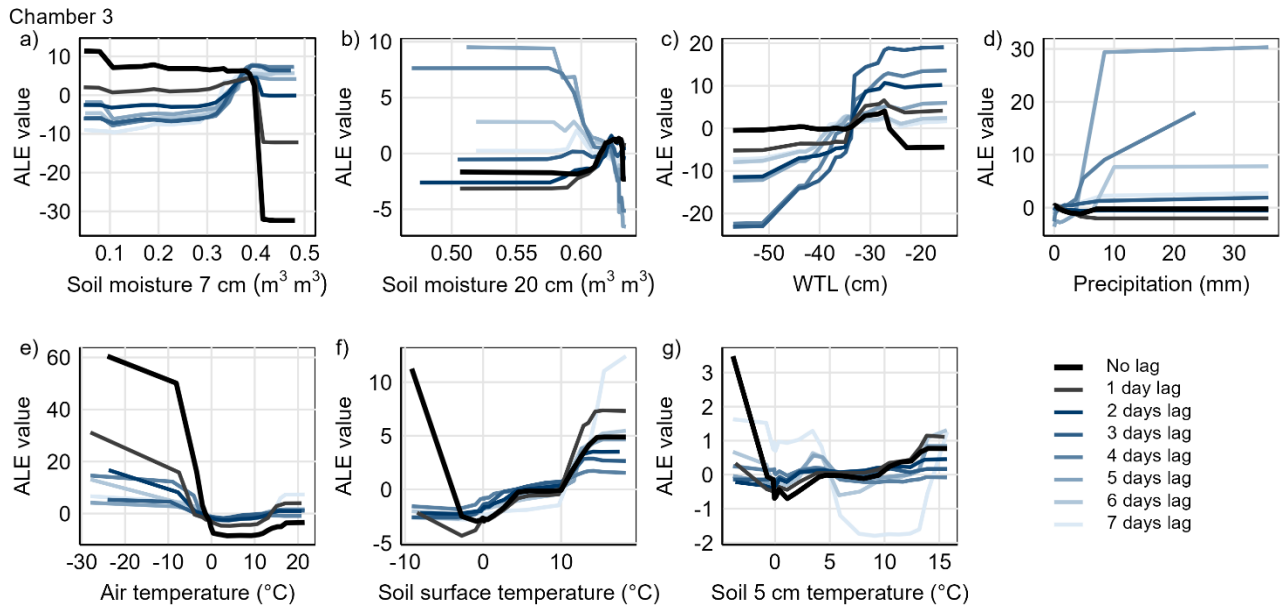

**Figure S6.2: Response curves between  $\text{N}_2\text{O}$  flux and environmental variables visualized using Accumulated Local Effects (ALE) for chamber 3. See details in caption above (Fig. S6.1)**

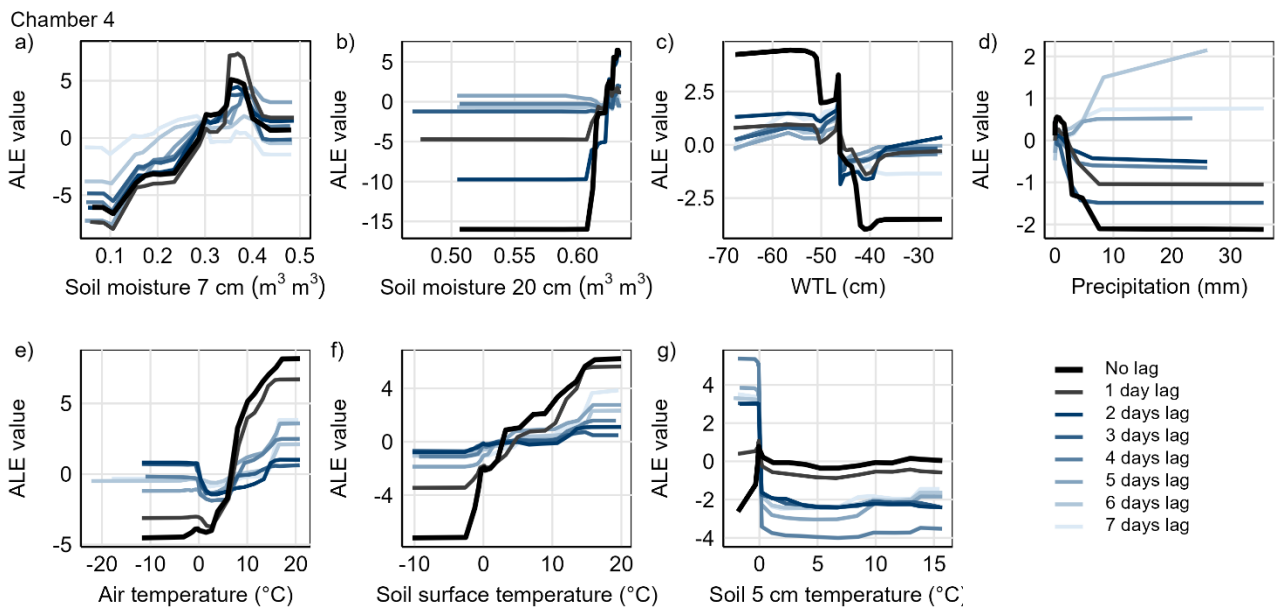

**Figure S6.3: Response curves between  $\text{N}_2\text{O}$  flux and environmental variables visualized using Accumulated Local Effects (ALE) for chamber 4. See details in caption above (Fig. S6.1)**

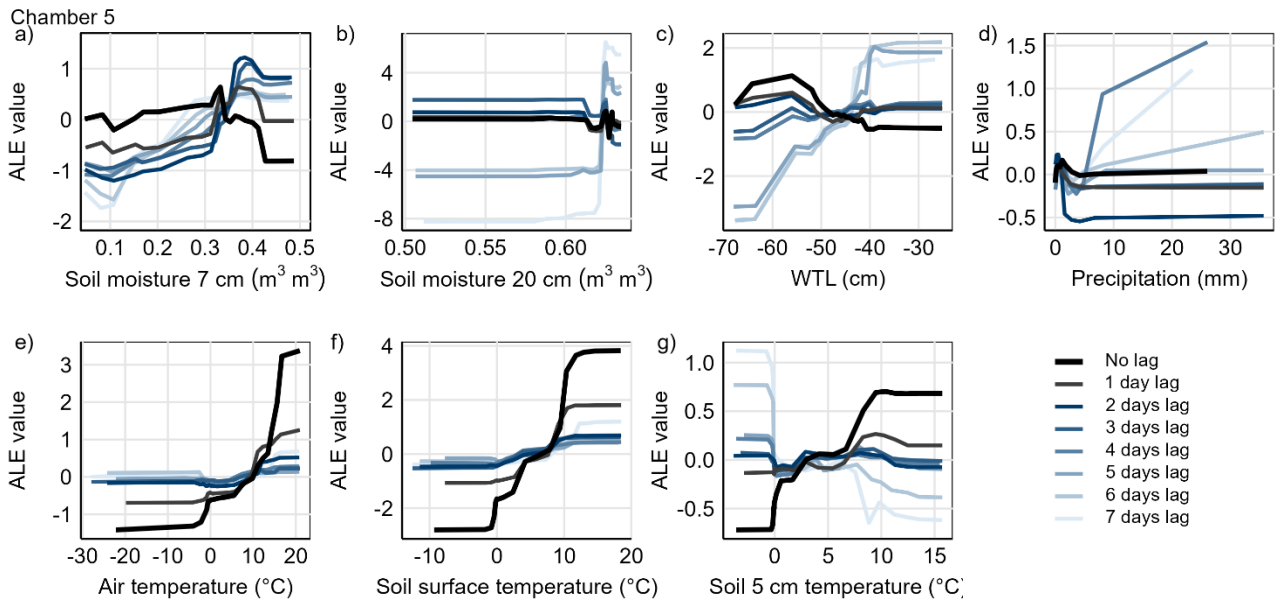

**Figure S6.4: Response curves between  $\text{N}_2\text{O}$  flux and environmental variables visualized using Accumulated Local Effects (ALE) for chamber 5. See details in caption above (Fig. S6.1)**

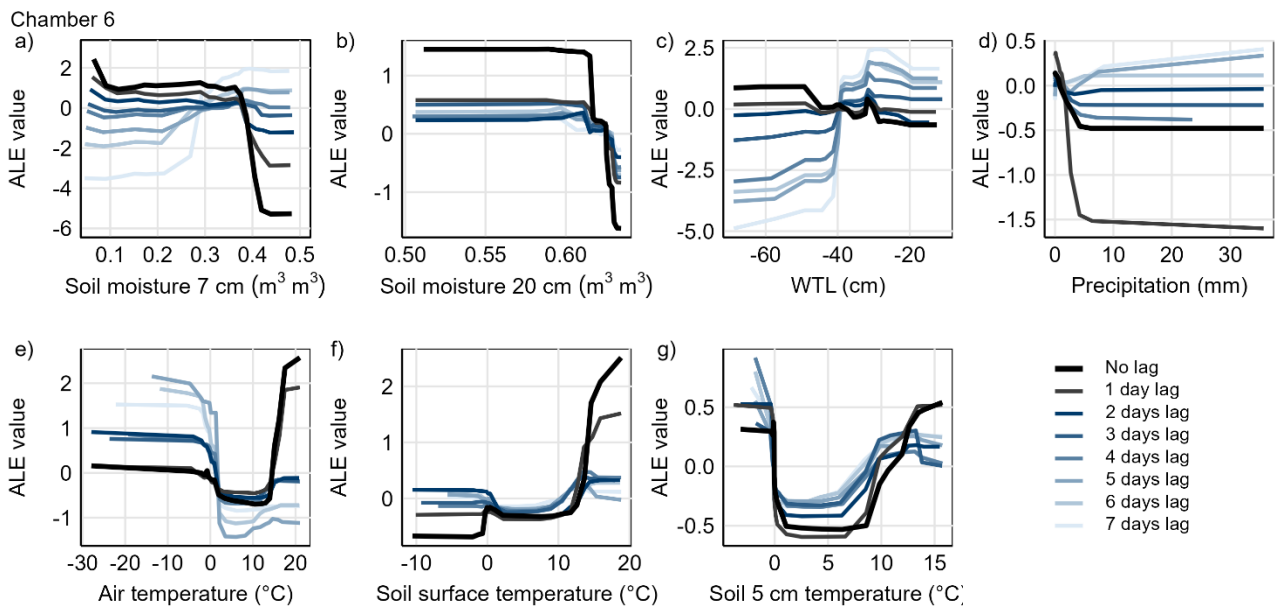

**Figure S6.5: Response curves between  $\text{N}_2\text{O}$  flux and environmental variables visualized using Accumulated Local Effects (ALE) for chamber 6. See details in caption above (Fig. S6.1)**

## S7. N<sub>2</sub>O budgets and seasonal contributions

**Table S7.1: Annual N<sub>2</sub>O budgets in different chambers. Unit of N<sub>2</sub>O budget is mg N<sub>2</sub>O m<sup>-2</sup> y<sup>-1</sup>. The annual N<sub>2</sub>O budget includes only part of the year in 2015 (summer and autumn) and 2019 (spring and summer) (\*).**

| Chamber | 2015* | 2016 | 2017 | 2018 | 2019* |
|---------|-------|------|------|------|-------|
| 1       | 469   | 1886 | 2114 | 399  | 790   |
| 2       | 360   | 1613 | 1367 | 222  | 283   |
| 3       | 350   | 1340 | 1116 | 281  | 284   |
| 4       | 141   | 613  | 743  | 214  | 112   |
| 5       | 88    | 210  | 246  | 112  | 155   |
| 6       | 87    | 214  | 200  | 59   | 85    |

**Table S7.2: Contributions of spring fluxes to annual N<sub>2</sub>O budgets. Contributions are expressed as percentages of the annual budget (%). The annual N<sub>2</sub>O budget includes only part of the year in 2015 and 2019 (\*).**

| Chamber | 2015* | 2016 | 2017 | 2018 | 2019* |
|---------|-------|------|------|------|-------|
| 1       | -     | 5    | 12   | 9    | 24    |
| 2       | -     | 3    | 11   | 6    | 19    |
| 3       | -     | 4    | 14   | 9    | 26    |
| 4       | -     | 11   | 27   | 13   | 45    |
| 5       | -     | 8    | 6    | 8    | 21    |
| 6       | -     | 2    | 12   | 9    | 33    |

**Table S7.3: Contributions of summer fluxes to annual N<sub>2</sub>O budgets. Contributions are expressed as percentages of the annual budget (%). The annual N<sub>2</sub>O budget includes only part of the year in 2015 and 2019 (\*).**

| Chamber | 2015* | 2016 | 2017 | 2018 | 2019* |
|---------|-------|------|------|------|-------|
| 1       | 77    | 52   | 61   | 64   | 48    |
| 2       | 53    | 79   | 67   | 59   | 64    |
| 3       | 63    | 36   | 48   | 41   | 63    |
| 4       | 66    | 35   | 39   | 36   | 34    |
| 5       | 52    | 44   | 48   | 28   | 15    |
| 6       | 66    | 45   | 42   | 42   | 45    |

**Table S7.4: Contributions of autumn fluxes to annual N<sub>2</sub>O budgets. Contributions are expressed as percentages of the annual budget (%). The annual N<sub>2</sub>O budget includes only part of the year in 2015 and 2019 (\*).**

| Chamber | 2015* | 2016 | 2017 | 2018 | 2019* |
|---------|-------|------|------|------|-------|
| 1       | 18    | 5    | 14   | 7    | -     |
| 2       | 37    | 5    | 9    | 12   | -     |
| 3       | 24    | 7    | 14   | 13   | -     |

|   |    |   |    |   |   |
|---|----|---|----|---|---|
| 4 | 30 | 5 | 6  | 5 | - |
| 5 | 41 | 6 | 16 | 8 | - |
| 6 | 25 | 8 | 12 | 6 | - |

**Table S7.5: Contributions of winter fluxes to annual N<sub>2</sub>O budgets. Contributions are expressed as percentages of the annual budget (%). The annual N<sub>2</sub>O budget includes only part of the year in 2015 and 2019 (\*).**

| Chamber | 2015* | 2016 | 2017 | 2018 | 2019* |
|---------|-------|------|------|------|-------|
| 1       | -     | 37   | 14   | 20   | -     |
| 2       | -     | 13   | 24   | 23   | -     |
| 3       | -     | 53   | 27   | 36   | -     |
| 4       | -     | 49   | 30   | 45   | -     |
| 5       | -     | 43   | 34   | 56   | -     |
| 6       | -     | 44   | 20   | 43   | -     |

### S8. Model performance outside training period

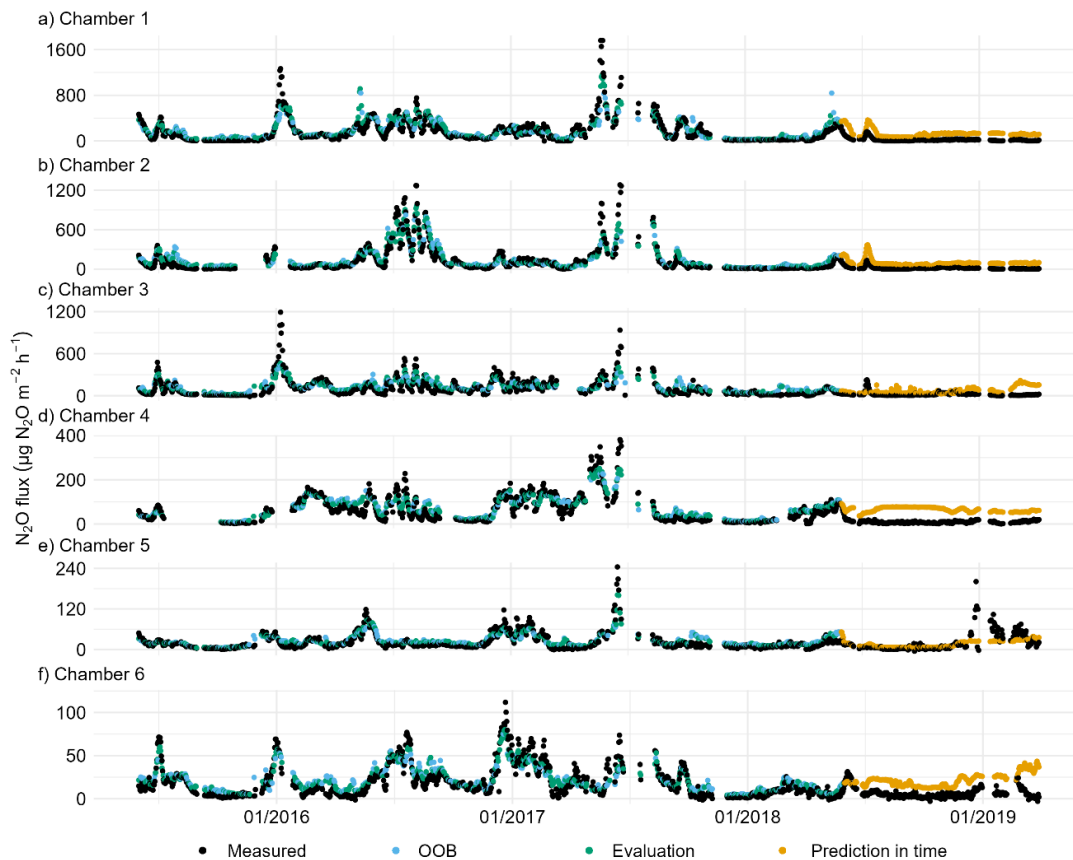

**Figure S8: Measured and predicted N<sub>2</sub>O fluxes plotted against time. Figures (a-f) show predicted values from random forest with conditional inference trees separately for six chambers. Points are colored by the used data with out-of-bag (OOB) data, evaluation data within training period (30 % of first three years of data) and prediction in time data (outside model training period, fourth year of data) different types of evaluation datasets, and daily means of measured fluxes.**
